# ACKNOWLEDGMENT

The Editor-in-Chief and the Editors of ANESTHESIOLOGY wish to thank the following consultants and referees for making available their expert knowledge in reviews of manuscripts.

DR. SERGE ADNOT  
STEVEN J. ALLEN, M.D.  
J. JEFFREY ANDREWS, M.D.  
WILLIAM P. ARNOLD III, M.D.  
G. RICHARD ARTHUR, PH.D.  
ALAN A. ARTRU, M.D.  
JOHN L. ATLEE III, M.D.  
MICHAEL J. AVRAM, PH.D.  
HELEN A. BAGHDOYAN, PH.D.  
PETER L. BAILEY, M.D.  
CEDRIC R. BAINTON, M.D.  
PAUL G. BARASH, M.D.  
STEVEN J. BARKER, M.D.  
GERARD BASHEIN, M.D., PH.D.  
HENRIK H. BENDIXEN, M.D.  
JONATHAN L. BENUMOF, M.D.  
CHARLES B. BERDE, M.D.  
ALBERT BERGER, PH.D.  
NORMAN A. BERGMAN, M.D.  
MICHAEL R. BERMAN, PH.D.  
FREDERIC A. BERRY, JR., M.D.  
THOMAS J. BLANCK, M.D.  
KENNETH BLOCH, M.D.  
BYRON BLOOR, PH.D.  
BRUCE BOLLEN, M.D.  
CECIL BOREL, M.D.  
ZELJKO J. BOSNJAK, PH.D.  
PHILLIP O. BRIDENBAUGH, M.D.  
JAY B. BRODSKY, M.D.  
PHILIP R. BROMAGE, M.B.  
ROBERT BROWN, M.D.  
HAROLD BUCK, M.S.  
MICHAEL K. CAHALAN, M.D.  
RODERICK K. CALVERLEY, M.D.  
ROBERT A. CAPLAN, M.D.  
NEIL CASTLE, PH.D.  
H. S. CHADWICK, M.D.  
JACQUES E. CHELLEY, M.D., PH.D.  
PENG CHEN, M.D.  
FIONA CLEMENTS, M.D.  
NEAL H. COHEN, M.D.  
SHEILA E. COHEN, M.B.  
J. G. COLLINS, PH.D.  
RANDALL C. CORK, M.D.  
CHARLES J. COTÉ, M.D.  
ROBERT K. CRONE, M.D.  
GREGORY CROSBY, M.D.  
MR. HAROLD J. DEMONACO  
CLIFFORD S. DEUTSCHMAN, M.D.  
COSMO A. DI FAZIO, M.D.  
HOWARD C. DITTRICH, M.D.  
DENNIS DOBLAR, M.D., PH.D.  
BARBARA A. DODSON, M.D.  
FRANCOIS DONATI, PH.D., M.D.  
JOHN J. DOWNES, M.D.  
KENNETH DRASNER, M.D.  
LAMBERTUS J. DROP, M.D.  
JOHN C. DRUMMOND, M.D.  
RONALD DUECK, M.D.  
EDMOND I. EGER II, M.D.

JAMES EISENKRAFT, M.D.  
JOHN E. ELLIS, M.D.  
NORIG ELLISON, M.D.  
BURTON S. EPSTEIN, M.D.  
ALEX S. EVERS, M.D.  
H. BARRIE FAIRLEY, M.B.  
THOMAS W. FEELEY, M.D.  
HAL S. FELDMAN, D.Sc.  
MICHAEL FIFER, M.D.  
JEFFREY E. FLETCHER, PH.D.  
FRANCIS F. FOLDES, M.D.  
ROBERT FORBES, M.D.  
PATRICK A. FOSTER, M.D., CH.B.  
ALISON B. FROESE, M.D.  
MATTHEW FROSCH, M.D., PH.D.  
STEVE FULLER, PH.D.  
DAVID M. GABA, M.D.  
JOSEPH C. GABEL, M.D.  
THOMAS J. GAL, M.D.  
JOHN D. GALLAGHER, M.D.  
GERALD F. GEBHART, PH.D.  
ADRIAN W. GELB, M.D.  
MOHAMED M. GHONEIM, M.D.  
D. DAVID GLASS, M.D.  
ARY GOLDBERGER, M.D.  
MICHAEL L. GOOD, M.D.  
MARJORIE R. GRAFE, M.D.  
GLENN P. GRAVLEE, M.D.  
WILLIAM J. GREELEY, M.D.  
GERALD A. GRONERT, M.D.  
JEFFREY B. GROSS, M.D.  
WILLIAM K. HAMILTON, M.D.  
RAAFAT S. HANNALLAH, M.D.  
JOHN F. HANSBROUGH, M.D.  
ANDREW P. HARRIS, M.D.  
THOMAS K. HENTHORN, M.D.  
PAUL R. HICKEY, M.D.  
BRADLEY J. HINDMAN, M.D.  
ROBERTA HINES, M.D.  
WILLIAM E. HOFFMAN, PH.D.  
CYRUS C. HOPKINS, M.D.  
PHILIPPE HOUSMANS, M.D., PH.D.  
ROLF D. HUBMAYR, M.D.  
ROBERT J. HUDSON, M.D.  
CARL C. HUG, JR., M.D., PH.D.  
C. J. HULL, M.B.  
WILLIAM E. HURFORD, M.D.  
PAUL A. IAIZZO, PH.D.  
JAMES JACOBS, PH.D.  
LOUIS JACOBSON, M.D.  
ROGER A. JOHNS, M.D.  
ROBERT G. JOHNSON, M.D.  
ROYCE W. JOHNSON, PH.D.  
YOOGOO KANG, M.D.  
ZVONIMIR S. KATUSIC, M.D.,  
PH.D.  
MICHAEL KAYE, M.D.  
ARTHUR S. KEATS, M.D.  
JOHN C. KEIFER, M.D.  
RALPH L. KEIL, PH.D.

JOAN J. KENDIG, PH.D.  
FRANK H. KERN, M.D.  
EVAN D. KHARASCH, M.D., PH.D.  
THOMAS S. KICKLER, M.D.  
WILLIAM R. KIMBALL, M.D.  
IGOR KISSIN, M.D., PH.D.  
RICHARD L. KNILL, M.D.  
DR. B. KNOWLTON  
DONALD D. KOBLIN, M.D.  
AARON F. KOPMAN, M.D.  
ELLIOT J. KRANE, M.D.  
TOM C. KREJCIE, M.D.  
CAROL L. LAKE, M.D.  
KENNETH R. LAMANTIA, M.D.  
DR. THOMAS A. LANE  
WILLIAM L. LANIER JR., M.D.  
DAVID R. LARACH, M.D., PH.D.  
MARILYN G. LARACH, M.D.  
C. PHILIP LARSON, JR., M.D.  
DAN LAWSON, M.D.  
JERROLD LERMAN, M.D.  
JACQUELINE LEUNG, M.D.  
JERROLD H. LEVY, M.D.  
WARREN J. LEVY, M.D.  
CYNTHIA LIEN, M.D.  
KAREN S. LINDEMAN, M.D.  
LAWRENCE LITT, M.D.  
MARTIN J. LONDON, M.D.  
DAVID E. LONGNECKER, M.D.  
EDWARD LOWENSTEIN, M.D.  
BRUCE MACIVER, PH.D.  
MAZEN A. MAKTABI, M.D.  
WAYNE K. MARSHALL, M.D.  
DONALD E. MARTIN, M.D.  
RICHARD I. MAZZE, M.D.  
ROBERT W. MCPHERSON, M.D.  
ROBERT G. MERIN, M.D.  
JOHN D. MICHENFELDER, M.D.  
LESLIE NEWBERG MILDE, M.D.  
EDWARD D. MILLER, JR., M.D.  
RONALD D. MILLER, M.D.  
MARK M. MITCHELL, M.D.  
H. O. MORISHIMA, M.D., PH.D.  
JAMES L. MOSTROM, M.D.  
SHEILA M. MULDOON, M.D.  
STANLEY MURAVCHICK, M.D.  
PAUL A. MURRAY, PH.D.  
CONSTANCE F. NEELY, M.D.  
THOMAS E. NELSON, PH.D.  
FREDRICK K. ORKIN, M.D.  
ANDRANIK OVASSAPIAN, M.D.  
NATHAN L. PACE, M.D.  
JOSEPH J. PANCRAZIO, M.D., PH.D.  
STEPHEN D. PARKER, M.D.  
PIYUSH PATEL, M.D.  
RONALD G. PEARL, PH.D., M.D.  
CHRISTOPHER J. PETERSON, M.D.  
REUVEN PIZOV, M.D.  
DAVID M. POLANER, M.D.  
MARIE C. PRAGER, M.D.

HANS-JOACHIM PRIEBE, M.D.  
DONALD S. PROUGH, M.D.  
DR. E. PUIL  
SRINIVASA N. RAJA, M.D.  
IRA JAY RAMPIL, M.D.  
DR. SAMUEL I. RAPAPORT  
RICHARD L. RAUCK, M.D.  
L. BRIAN READY, M.D.  
KAI REHDER, M.D.  
LAURENCE S. REISNER, M.D.  
GEORGE F. RICH, M.D., PH.D.  
STEPHEN RIMAR, M.D.  
CHRISTINE S. RINDER, M.D.  
MICHAEL F. ROIZEN, M.D.  
PIETRO C. ROMANO, M.D.  
MARK A. ROSEN, M.D.  
CARL ROSOW, M.D.  
PETER T. ROTHSTEIN, M.D.  
JOAN RUFFLE, M.D.  
GEORGE W. RUNG, M.D.  
STEPHEN M. RUPP, M.D.  
GARFIELD B. RUSSELL, M.D.  
BEN F. RUSY, M.D.  
JOHN F. RYAN, M.D.  
DAVID J. SAHN, M.D.  
MARK S. SCHELLER, M.D.  
WILLIAM T. SCHMELING, M.E.,  
PH.D.  
ARTHUR J. L. SCHNEIDER, M.D.

ARMIN SCHUBERT, M.D.  
LAWRENCE B. SCHWARTZ, M.D.,  
PH.D.  
HOWARD A. SCHWID, M.D.  
PETER S. SEBEL, M.B.  
DANIEL I. SESSLER, M.D.  
JOHN W. SEVERINGHAUS, M.D.  
AUDREY C. SHAFER, M.D.  
STEVEN L. SHAFER, M.D.  
FREDERICK E. SIEBER, M.D.  
GARY C. SIECK, PH.D.  
NANCY SILVA, PH.D.  
RAYMOND S. SINATRA, M.D.  
THOMAS M. SKEEHAN, M.D.  
STEPHEN SLOGOFF, M.D.  
DAVID S. SMITH, M.D.  
ROBERT M. SPEAR, M.D.  
FRANK G. STANDAERT, M.D.  
THEODORE H. STANLEY, M.D.  
LINDA C. STEHLING, M.D.  
JOHN K. STENE, JR., M.D., PH.D.  
RICHARD C. STERN, M.D.  
DAVID J. STEWARD, M.B.  
ROBERT K. STOELTING, M.D.  
ROBERT STUDY, PH.D., M.D.  
JUDY Y. SU, PH.D.  
TOMMY SYMRENG, M.D.  
DARRELL L. TANELIAN, M.D.,  
PH.D.  
MARGARET TARPEY, M.D.

AUBREY E. TAYLOR, PH.D.  
RICHARD TEPLICK, M.D.  
JOHANNES THALHAMMER, D.V.M.  
GALE E. THOMPSON, M.D.  
DANIEL M. THYS, M.D.  
MARY L. TOD, PH.D.  
MIKE TOMASIC, V.M.D.  
JAMES R. TRUDELL, PH.D.  
T. TUNG, M.D.  
LEROY VANDAM, M.D.  
JOSE VENEGAS PH.D.  
JORGEN VIBY-MOGENSEN, M.D.  
RUTH E. WACHTEL, PH.D.  
PETER D. WAGNER, M.D.  
CLARENCE F. WARD, M.D.  
DAVID C. WARLTIER, M.D., PH.D.  
DAVID O. WARNER, M.D.  
DAVID S. WARNER, M.D.  
MEHERNOOR WATCHA, M.D.  
MATTHEW B. WEINGER, M.D.  
RICHARD B. WEISKOPF, M.D.  
DWAYNE R. WESTENSKOW, PH.D.  
RANDALL C. WETZEL, M.D.  
DAVID M. WHEELER, M.D., PH.D.  
PAUL F. WHITE, PH.D., M.D.  
MARGARET WOOD, M.B.  
JAMES R. ZAIDAN, M.D.  
GARY ZALOGA, M.D.  
MARK ZORNOW, M.D.
